# Supplementary material for: The influence of riparian evapotranspiration on stream hydrology and nitrogen retention in a subhumid Mediterranean catchment
Source: Copernicus journal article supplement (doi:10.5194/hess-2016-56), 2016-03-08
Supplement: Supplementary file 1 [file hess-2016-56-supplement.pdf]

1 **Title: Supplements of “The influence of riparian evapotranspiration on stream hydrology**  
2 **and nitrogen retention in a subhumid Mediterranean catchment”**

3 **Authors**

4 Anna Lupon<sup>1</sup>, Susana Bernal<sup>1,2</sup>, Sílvia Poblador<sup>1</sup>, Eugènia Martí<sup>2</sup>, Francesc Sabater<sup>1</sup>

5 **Affiliations**

6 <sup>1</sup> Department d'Ecologia, Facultat of Biologia, University of Barcelona, Av. Diagonal 643,  
7 08028, Barcelona, Spain.

8 <sup>2</sup> Integrative Freshwater Ecology Group, Center for Advanced Studies of Blanes (CEAB-  
9 CSIC), Accés a la Cala Sant Francesc 14, 17300, Blanes, Girona, Spain.

10 **Corresponding author:** Anna Lupon. [alupon@ub.edu](mailto:alupon@ub.edu)

11 **Table S1.** Annual precipitation (P), annual potential evapotranspiration (PET), P/PET ratio,  
 12 and riparian water depletion (RWD) for different catchments across climatic regions.

13

| Climate       | P (mm yr <sup>-1</sup> ) | PET (mm yr <sup>-1</sup> ) | P/PET | RWD (%) | Source                     |
|---------------|--------------------------|----------------------------|-------|---------|----------------------------|
| Arid          | 250                      | 2280                       | 0.11  | 33      | Dahm et al., 2002          |
| Arid          | 300                      | 1800                       | 0.17  | 36      | Doble et al., 2006         |
| Arid          | 400                      | 1400                       | 0.29  | 22      | Contreras et al., 2011     |
| Arid          | 255                      | 693                        | 0.37  | 20      | Goodrich et al., 2000      |
| Arid          | 570                      | 900                        | 0.63  | 13      | Springer et al., 2006      |
| Mediterranean | 1296                     | 1911                       | 0.68  | 9       | Scott, 1999                |
| Mediterranean | 780                      | 1055                       | 0.72  | 12      | Folch and Ferrer, 2015     |
| Mediterranean | 850                      | 1170                       | 0.73  | 7       | Wine and Zou, 2012         |
| Mediterranean | 750                      | 990                        | 0.77  | 5       | Sabater and Bernal, 2011   |
| Mediterranean | 925                      | 1100                       | 0.84  | 3.6     | Present Study              |
| Temperate     | 1780                     | 1400                       | 1.27  | 4       | Dunford and Fletcher, 1947 |
| Temperate     | 858                      | 590                        | 1.45  | 3       | Petrone et al., 2007       |
| Temperate     | 1523                     | 1011                       | 1.51  | 2.5     | Salemi et al., 2012        |
| Temperate     | 1800                     | 900                        | 2.00  | 1.2     | Dunford and Fletcher, 1947 |
| Tropical      | 4370                     | 1825                       | 2.39  | 1.4     | Cadol et al., 2012         |

14

## 15 **References**

16 Cadol, D., Kampf, S. and Wohl, E.: Effects of evapotranspiration on baseflow in a tropical  
 17 headwater catchment, *J. Hydrol.*, 462-463, 4–14, 2012.

18 Contreras, S., Jobbágy, E. G., Villagra, P. E., Noretto, M. D. and Puigdefábregas, J.: Remote  
 19 sensing estimates of supplementary water consumption by arid ecosystems of central  
 20 Argentina, *J. Hydrol.*, 397(1-2), 10–22, 2011.

21 Dahm, C. N., Cleverly, J. R., Coonrod E. Allred, J., Thibault, J. R., McDonnell, D. E. and  
22 Gilroy, D. J.: Evapotranspiration at the land/ water interface in a semi-arid drainage basin,  
23 *Freshw. Biol.*, 47(4), 831–844, 2002.

24 Doble, R., Simmons, C., Jolly, I. and Walker, G.: Spatial relationships between vegetation cover  
25 and irrigation-induced groundwater discharge on a semi-arid floodplain, Australia, *J. Hydrol.*,  
26 329(1-2), 75–97, 2006.

27 Dunford, E. G. and Fletcher, P. W.: Effect of removal of stream-bank vegetation upon water  
28 yield, *Am. Geophys. Union*, 28(1), 105–110, 1947.

29 Folch, A. and Ferrer, N.: The impact of poplar tree plantations for biomass production on the  
30 aquifer water budget and base flow in a Mediterranean basin., *Sci. Total Environ.*, 524-525,  
31 213–24, 2015.

32 Goodrich, D. C., Scott, R., Qi, J., Goff, B., Unkrich, C. L., Moran, M. S., Williams, D.,  
33 Schaeffer, S., Snyder, K., MacNish, R., Maddock, T., Pool, D., Chehbouni, a., Cooper, D. I.,  
34 Eichinger, W. E., Shuttleworth, W. J., Kerr, Y., Marsett, R. and Ni, W.: Seasonal estimates of  
35 riparian evapotranspiration using remote and in situ measurements, *Agric. For. Meteorol.*,  
36 105(1-3), 281–309, 2000.

37 Petrone, K., Buffam, I. and Laudon, H.: Hydrologic and biotic control of nitrogen export during  
38 snowmelt: A combined conservative and reactive tracer approach, *Water Resour. Res.*, 43(6),  
39 W06420, 2007.

40 Sabater, F. and Bernal, S.: Keeping healthy riparian and aquatic ecosystems in theMed-  
41 iterranean: challenges and solutions through riparian forest management., in *Water for Forests*  
42 *and People in the Mediterrane*, edited by M. Boirot, Y., Gracia, C., Palahí, pp. 151–155., 2011.

- 43 Salemi, L. F., Groppo, J. D., Trevisan, R., Marcos de Moraes, J., de Paula Lima, W. and  
44 Martinelli, L. A.: Riparian vegetation and water yield: A synthesis, *J. Hydrol.*, 454-455, 195–  
45 202, 2012.
- 46 Scott, D. F.: Managing riparian zone vegetation to sustain streamflow: results of paired  
47 catchment experiments in South Africa, *Can. J. For. Res.*, 29, 1149– 1157, 1999.
- 48 Springer, A. E., Amentt, M. a., Kolb, T. E. and Mullen, R. M.: Evapotranspiration of two  
49 vegetation communities in a high-elevation riparian meadow at Hart Prairie, Arizona, *Water*  
50 *Resour. Res.*, 42(3), 1–11, 2006.
- 51 Wine, M. L. and Zou, C. B.: Long-term streamflow relations with riparian gallery forest  
52 expansion into tallgrass prairie in the Southern Great Plains, USA, *For. Ecol. Manage.*,  
53 266(2012), 170–179, 2012.
